# Supplementary material for: Towards high-throughput exciton diffusion rate prediction in molecular organic semiconductors
Source: Royal Society of Chemistry journal article supplement (doi:10.1039/d4tc00737a), 2024-01-01
Supplement: d4tc00737a1.xlsx [file d4tc00737a1.xlsx]

## Sheet: EET_Data_F_wB97XD_B_6_31plusGd
Crystal	Dimer		Shortest distance between molecules (excluding hydrogens) (Angstroms)		Coulomb (meV)		Exact-exchange (meV)	Exchange-correlation (meV)	w-avg*Overlap (meV)		Total coupling (meV)		% of Coupling that is Coulombic				ATC Coupling Value (meV)		EET Coulomb Value (meV)	EET Coupling Value (meV)
OHEPID	Dimer13_M1_M2		3.32991		56.0219		-0.115154	-0.084331	29.9377		85.7601		65.0215				55.3016		56.0219	85.7601
MUVVEH	Dimer11_M1_M2		3.34961		64.2864		-0.098405	-0.113099	8.81471		72.8896		87.6881				63.5352		64.2864	72.8896
JOGYUC	Dimer5_M1_M2		3.36913		69.9914		-0.219177	-0.126834	0.622908		70.2683		98.6346				-68.2879		69.9914	70.2683
JOGYUC	Dimer4_M1_M3		3.35151		-69.0617		0.066758	0.064681	-0.584534		-69.5148		98.9739				-68.9628		-69.0617	-69.5148
IVEQAE	Dimer1_M1_M1		3.1341		-56.7453		-0.191455	0.022449	-12.4981		-69.4124		81.6981				-56.3977		-56.7453	-69.4124
VUBJOU	Dimer17_M2_M2		3.4405		66.0759		0.006916	7.9e-05	-1.51877		64.5641		97.743				65.3898		66.0759	64.5641
HOVDEE	Dimer11_M2_M2		3.50907		64.447		0.003608	-0.001542	-0.966361		63.4827		98.5149				63.7904		64.447	63.4827
VUBKAH02	Dimer7_M2_M2		3.31085		-63.3278		0.25502	0.146856	0.014531		-62.9114		99.3468				-62.1743		-63.3278	-62.9114
OHEPID	Dimer5_M1_M2		3.28082		63.7864		-1.18363	-0.208129	-0.005833		62.3888		97.8559				61.5864		63.7864	62.3888
MUPMOC	Dimer11_M1_M3		3.29076		59.3015		0.085373	-0.159208	0.929544		60.1572		98.0585				-57.7533		59.3015	60.1572
KIZTAR	Dimer7_M2_M2		3.29223		-55.7106		0.080677	0.091514	-4.31168		-59.8501		92.551				-55.4883		-55.7106	-59.8501
MUPMOC	Dimer17_M1_M2		3.37299		-59.3979		0.519311	0.251137	0.254641		-58.3728		98.3035				57.7547		-59.3979	-58.3728
VUBKAH01	Dimer11_M1_M1		6.11886		59.0724		-0.000346	-0.000962	-0.803529		58.2676		98.6559				58.2509		59.0724	58.2676
VUBKAH	Dimer11_M1_M1		6.05436		57.2413		-0.00028	0.001311	-0.258209		56.9842		99.5482				56.4432		57.2413	56.9842
KIZTAR01	Dimer5_M1_M1		3.32433		-51.6796		0.110711	0.098075	-5.16984		-56.6407		90.5734				-51.4584		-51.6796	-56.6407
KIZSUK	Dimer3_M1_M1		3.38555		56.1258		0.004966	-0.000594	0.499633		56.6298		99.1079				55.354		56.1258	56.6298
JOGYUC	Dimer2_M1_M2		3.2912		-55.8157		0.102336	0.082947	-0.326256		-55.9566		99.0918				55.1228		-55.8157	-55.9566
VUBJOU	Dimer13_M1_M2		3.40893		-56.2437		0.085625	0.098887	1.47904		-54.5802		97.1272				-55.2102		-56.2437	-54.5802
HOVDEE	Dimer5_M1_M2		3.37049		57.5475		-0.187682	-0.128177	-2.79839		54.4333		94.8662				56.8126		57.5475	54.4333
HOVDAA	Dimer5_M2_M3		3.283		49.9635		-0.40011	-0.086122	3.13692		52.6142		93.2387				49.1759		49.9635	52.6142
HOVDEE	Dimer9_M1_M1		3.43386		54.0003		0.004883	0.003324	-1.54271		52.4658		97.2081				53.3798		54.0003	52.4658
MUPMOC	Dimer13_M1_M2		3.33332		53.3657		-0.466531	-0.138137	-0.352708		52.4083		98.2376				52.2778		53.3657	52.4083
JOGYUC	Dimer7_M1_M1		3.42913		-52.709		0.222498	0.127251	0.141092		-52.2182		99.0774				-51.8246		-52.709	-52.2182
HEHQUJ01	Dimer5_M1_M2		3.27629		-46.7898		0.046998	0.045162	-5.06579		-51.7635		90.0709				-46.4025		-46.7898	-51.7635
MUVVEH	Dimer5_M1_M2		3.34399		49.7068		0.114892	-0.061239	0.597658		50.3581		98.4672				49.0548		49.7068	50.3581
VUBKAH02	Dimer3_M1_M1		3.22792		-50.5334		0.404943	0.116246	-0.115566		-50.1278		98.7556				-49.3868		-50.5334	-50.1278
HEHQUJ	Dimer5_M1_M2		3.29726		46.1537		-0.044539	-0.044127	3.14725		49.2123		93.4482				45.7665		46.1537	49.2123
PUGSIW	Dimer1_M1_M2		3.38725		48.8392		-0.26789	-0.241893	-0.10877		48.2206		98.7493				48.4608		48.8392	48.2206
HOVDAA	Dimer3_M1_M3		3.28167		43.7283		-0.496267	-0.055343	4.99436		48.171		88.7447				-43.0039		43.7283	48.171
HOVDEE	Dimer7_M1_M2		3.42224		-50.7587		0.243974	0.103873	2.83433		-47.5765		94.1006				49.7351		-50.7587	-47.5765
VUBKAH01	Dimer3_M1_M1		3.40459		-46.1344		0.202526	0.098882	-0.96645		-46.7995		97.3253				-45.1652		-46.1344	-46.7995
MUVVEH01	Dimer6_M1_M2		3.45885		46.9885		-0.038663	-0.058343	-0.261102		46.6304		99.2436				46.1157		46.9885	46.6304
MUVVEH01	Dimer5_M1_M2		3.28193		-46.0766		-0.490375	0.017067	0.281054		-46.2688		98.3175				-44.2863		-46.0766	-46.2688
NULYEB	Dimer3_M3_M3		3.41736		46.0234		0.003776	0.002788	-0.177629		45.8524		99.6014				45.5584		46.0234	45.8524
MUPMOC	Dimer12_M2_M4		3.31906		-45.8883		0.209583	0.120045	0.791238		-44.7674		97.6156				45.3083		-45.8883	-44.7674
VUBKAH	Dimer3_M1_M1		3.34571		-44.8949		0.223333	0.087809	0.566202		-44.0175		98.0832				-43.9831		-44.8949	-44.0175
VUBKAH02	Dimer5_M1_M2		3.24291		45.4606		-0.053277	-0.055047	-1.57551		43.7767		96.4284				-44.8106		45.4606	43.7767
MUPMOC	Dimer15_M1_M3		3.34202		-43.2443		0.274446	0.09966	-0.489861		-43.36		98.0413				42.2208		-43.2443	-43.36
HOVDAA	Dimer11_M3_M3		3.65069		39.012		0.000226	0.000279	2.98087		41.9934		92.9004				38.5707		39.012	41.9934
JOGYUC	Dimer11_M2_M2		3.44223		-41.8525		0.068425	0.066162	0.145941		-41.572		99.3342				-41.7291		-41.8525	-41.572
VUBKAH	Dimer9_M1_M1		5.92556		41.6146		-0.000493	-0.001976	-0.323715		41.2884		99.2223				41.2142		41.6146	41.2884
VUBKAH01	Dimer9_M1_M1		6.0627		41.4905		-0.000394	-0.002312	-0.361821		41.126		99.1291				41.0891		41.4905	41.126
VUBJOU	Dimer15_M1_M2		3.41508		-41.5813		0.030716	0.027481	1.20284		-40.3202		97.0566				41.1107		-41.5813	-40.3202
VUBJOU	Dimer7_M1_M1		3.34373		39.6312		0.002868	-5.3e-05	-0.153839		39.4802		99.606				39.1618		39.6312	39.4802
HEHQUJ	Dimer7_M1_M1		3.35705		-34.82		0.043284	0.039217	-4.68447		-39.4219		87.9582				-34.6908		-34.82	-39.4219
HOVDAA	Dimer7_M2_M2		3.49645		38.4619		0.000224	0.00013	0.478428		38.9407		98.7705				37.963		38.4619	38.9407
FOSPOV	Dimer7_M1_M3		3.37281		39.2454		-0.119125	-0.065642	-0.194071		38.8666		99.0439				38.5188		39.2454	38.8666
FOSPOV01	Dimer7_M1_M3		3.35826		-37.9808		0.105653	0.040452	-0.593983		-38.4287		98.0887				37.3808		-37.9808	-38.4287
KIZSUK	Dimer1_M1_M1		3.26535		-36.1511		0.082274	0.064446	-1.8226		-37.827		94.8339				-35.9477		-36.1511	-37.827
JOGYUC	Dimer13_M1_M2		3.46475		37.5233		-0.052755	-0.053484	0.079504		37.4966		99.5074				-37.1094		37.5233	37.4966
FOSPOV	Dimer13_M1_M2		5.53425		-36.7613		0.001533	0.001667	0.139997		-36.6181		99.612				-36.2395		-36.7613	-36.6181
FOSPOV01	Dimer13_M1_M2		5.51617		-36.4427		0.001725	0.002425	0.010665		-36.4278		99.9594				-35.9101		-36.4427	-36.4278
KIZTAR01	Dimer3_M2_M2		3.06127		-33.4515		0.04697	0.033829	-3.0455		-36.4162		91.453				-33.3305		-33.4515	-36.4162
JOGYUC	Dimer26_M1_M2		6.86667		36.6647		-0.00023	-0.003518	-1.02552		35.6355		97.2694				-36.1381		36.6647	35.6355
VABGIS	Dimer17_M3_M7		3.35702		-35.117		0.041733	0.038833	-0.335015		-35.3715		98.8304				-35.117		-35.117	-35.3715
HEHQUJ	Dimer17_M1_M2		3.79907		-35.6203		0.018831	0.023084	0.474145		-35.1042		98.5719				-35.0836		-35.6203	-35.1042
NULYEB	Dimer1_M3_M3		3.28262		-34.653		0.049104	0.042412	-0.123384		-34.6848		99.3837				-34.5334		-34.653	-34.6848
HEHQUJ01	Dimer17_M1_M2		3.82092		35.8231		-0.018903	-0.022941	-1.40593		34.3753		96.1155				35.266		35.8231	34.3753
HEHQUJ01	Dimer7_M1_M1		3.34863		-35.8617		0.04633	0.041067	1.58274		-34.1916		95.5501				-35.7031		-35.8617	-34.1916
HOVDEE	Dimer3_M1_M2		3.33977		-38.5146		0.02276	0.016007	4.41412		-34.0617		89.6366				-38.2603		-38.5146	-34.0617
VUBKAH02	Dimer9_M1_M2		3.39683		-33.2467		0.040485	0.037443	-0.224339		-33.3931		99.099				32.9734		-33.2467	-33.3931
VUBKAH02	Dimer1_M1_M2		3.17932		34.0846		0.008897	-0.002694	-1.18364		32.9071		96.6121				33.9817		34.0846	32.9071
FOSPUB	Dimer9_M1_M1		6.2556		32.6319		2e-05	0.000518	-0.004346		32.6281		99.985				32.1387		32.6319	32.6281
VUBKAH02	Dimer21_M1_M1		6.64665		29.6012		-2.2e-05	-0.000159	2.73689		32.3379		91.5361				29.3343		29.6012	32.3379
JOGYUC	Dimer1_M1_M3		3.27081		32.6832		-0.054908	-0.064604	-0.404646		32.159		98.4216				32.2344		32.6832	32.159
FOSPOV03	Dimer13_M1_M2		5.45509		-32.6682		0.002114	0.002802	0.722444		-31.9408		97.822				-32.0797		-32.6682	-31.9408
HOVDEE	Dimer25_M2_M2		6.33295		-32.637		0.000168	0.002193	1.04318		-31.5914		96.8959				-32.0605		-32.637	-31.5914
JOGYUC	Dimer17_M1_M2		5.7163		-30.6966		0.000771	0.002687	-0.633759		-31.3269		97.9664				30.1537		-30.6966	-31.3269
KIZTAR	Dimer15_M1_M1		4.14324		21.467		-0.001943	-0.003452	9.70984		31.1714		68.8437				21.2816		21.467	31.1714
OHEPID	Dimer9_M1_M5		3.31735		41.199		-0.148446	-0.094023	-10.4052		30.5513		79.4632				40.6567		41.199	30.5513
HOVDEE	Dimer13_M2_M2		3.80737		-31.7645		0.015408	0.015334	1.27113		-30.4626		96.0628				-31.5208		-31.7645	-30.4626
HOVDAA	Dimer9_M1_M1		3.60644		32.4561		0.001268	0.001613	-2.16323		30.2958		93.7436				32.0875		32.4561	30.2958
VUBJOU	Dimer5_M1_M1		3.29649		-31.38		0.04291	0.036582	1.07515		-30.2254		96.451				-31.2656		-31.38	-30.2254
VUBJOU	Dimer47_M2_M2		7.59408		17.2882		0	4e-06	12.8372		30.1254		57.3875				17.1367		17.2882	30.1254
HOVDAA	Dimer13_M2_M3		3.67605		-20.6817		-0.002867	-0.003255	-8.64451		-29.3323		70.5082				20.5087		-20.6817	-29.3323
NULYEB	Dimer19_M3_M3		6.19003		-29.1475		0.00079	0.004932	-0.157215		-29.299		99.4441				-28.5266		-29.1475	-29.299
IVEQAE	Dimer9_M1_M2		3.44858		-29.312		0.022351	0.023709	0.02665		-29.2393		99.7526				-29.1432		-29.312	-29.2393
IVEQAE	Dimer3_M1_M2		3.14284		30.3386		-0.038069	-0.032849	-1.15789		29.1098		96.1073				30.2097		30.3386	29.1098
FOSPOV	Dimer17_M1_M2		6.09953		-28.8512		-7e-06	0.001563	-0.127492		-28.9771		99.5547				-28.3518		-28.8512	-28.9771
VUBKAH02	Dimer17_M2_M2		5.6206		27.993		4.2e-05	-9e-05	0.58193		28.5749		97.963				27.7104		27.993	28.5749
IVEQAE	Dimer7_M2_M2		3.39509		-27.4235		0.054728	0.034657	-0.924463		-28.2586		96.4348				-26.9282		-27.4235	-28.2586
VUBJOU	Dimer3_M1_M2		3.17649		34.2132		-0.02492	-0.053542	-6.0856		28.0492		84.7338				-33.718		34.2132	28.0492
FOSPOV03	Dimer5_M1_M3		3.27772		27.2538		-0.481111	-0.193154	1.36377		27.9433		93.0423				-25.4353		27.2538	27.9433
OHEPID	Dimer57_M1_M6		6.66294		20.8335		-9.8e-05	-0.002477	6.75135		27.5823		75.5181				20.5008		20.8335	27.5823
FOSPUB	Dimer1_M1_M1		3.33301		-27.7743		0.193397	0.117361	0.036347		-27.4272		98.7657				-26.7448		-27.7743	-27.4272
FOSPOV01	Dimer17_M1_M2		6.01442		-27.2344		-5.5e-05	0.00154	-0.03572		-27.2686		99.8632				-26.7335		-27.2344	-27.2686
KIZTAR	Dimer3_M1_M1		3.05144		-20.2623		0.040583	0.033303	-6.44997		-26.6384		75.6447				-20.2734		-20.2623	-26.6384
IVEQAE	Dimer15_M2_M2		4.05225		20.3352		-0.002034	-0.002269	6.167		26.4979		76.7178				20.1387		20.3352	26.4979
VUBKAH01	Dimer15_M1_M1		7.78894		26.3623		-3e-06	3.1e-05	-0.319683		26.0427		98.8018				26.1198		26.3623	26.0427
VUBKAH	Dimer15_M1_M1		7.76073		26.0096		-3e-06	-7.7e-05	-0.084034		25.9255		99.6776				25.7674		26.0096	25.9255
KIZTAR01	Dimer11_M2_M2		3.90305		19.7116		-0.001667	-0.002945	5.36283		25.0698		78.5979				19.5459		19.7116	25.0698
VUBKAH01	Dimer7_M1_M1		4.83908		-25.896		0.002087	0.002029	0.933493		-24.9584		96.5058				-25.6575		-25.896	-24.9584
VUBJOU	Dimer29_M1_M1		6.06644		-26.0929		0.001036	0.003714	1.22233		-24.8659		95.5085				-25.453		-26.0929	-24.8659
VUBKAH	Dimer7_M1_M1		4.72074		-25.7556		0.002662	0.003295	0.912917		-24.8368		96.5552				-25.5212		-25.7556	-24.8368
MUVVEH	Dimer9_M2_M6		3.34892		37.3973		-0.100605	-0.094332	-12.3845		24.8179		74.8295				36.8576		37.3973	24.8179
VUBJOU	Dimer31_M2_M2		6.26554		-20.9807		0.000182	0.002346	-3.65762		-24.6358		85.146				-20.5311		-20.9807	-24.6358
MUVVEH	Dimer15_M1_M5		3.36186		24.1167		-0.031734	-0.038097	0.144398		24.1912		99.1195				23.8357		24.1167	24.1912
MUVVEH	Dimer45_M1_M6		6.57122		23.0383		-0.000181	-0.001614	1.0598		24.0963		95.595				22.6981		23.0383	24.0963
FOSPUB	Dimer5_M1_M1		4.35482		-24.4361		0.002813	0.002906	0.344989		-24.0854		98.5851				-24.2404		-24.4361	-24.0854
VUBKAH	Dimer17_M1_M1		7.94551		23.6217		0	0	-0.011998		23.6097		99.9492				23.3163		23.6217	23.6097
KIZTAR01	Dimer13_M1_M1		3.92865		19.06		-0.00209	-0.003041	4.46461		23.5195		81.0038				18.8703		19.06	23.5195
HOVDAA	Dimer23_M1_M3		6.9079		-15.3479		2e-06	3.4e-05	-7.39075		-22.7386		67.4969				15.1965		-15.3479	-22.7386
FOSPUB	Dimer7_M1_M1		4.93591		22.7081		-0.000255	-7.1e-05	0.025169		22.7329		99.8879				22.4175		22.7081	22.7329
MUVVEH	Dimer41_M1_M6		6.48845		-18.864		5.6e-05	0.000354	-3.83108		-22.6947		83.1179				18.5623		-18.864	-22.6947
MUPMOC	Dimer9_M2_M4		3.22248		-24.5224		0.017763	0.016278	1.86204		-22.6263		92.8229				24.398		-24.5224	-22.6263
KIZTAR	Dimer1_M1_M1		3.03962		-34.0101		0.048387	0.03774	11.356		-22.568		74.8261				-33.9115		-34.0101	-22.568
HOVDAA	Dimer17_M1_M2		3.95183		20.534		-8.8e-05	-0.001094	1.0338		21.5666		95.2015				-20.215		20.534	21.5666
FOSPOV03	Dimer17_M1_M2		6.12046		-22.9037		-0.00013	0.001061	1.57607		-21.3266		93.5572				-22.4361		-22.9037	-21.3266
KIZTAR	Dimer11_M2_M2		3.78046		20.7093		-0.002284	-0.003555	0.598717		21.3022		97.1636				20.4036		20.7093	21.3022
MUPMOC	Dimer32_M1_M4		6.6708		22.7059		-0.000165	-0.002039	-1.52795		21.1758		93.6865				22.3386		22.7059	21.1758
HEHQUJ01	Dimer9_M2_M2		3.54262		17.4984		-0.003142	-0.004191	3.64136		21.1325		82.7462				17.2551		17.4984	21.1325
HEHQUJ01	Dimer27_M1_M1		6.63147		21.8436		4e-06	2.8e-05	-0.711203		21.1324		96.8466				21.559		21.8436	21.1324
HEHQUJ01	Dimer3_M1_M1		3.24942		-16.8651		0.025269	0.023192	-4.28855		-21.1051		79.5444				-16.9573		-16.8651	-21.1051
MUVVEH01	Dimer7_M1_M2		3.72318		20.2384		-0.000225	-0.00022	0.026647		20.2646		99.8663				20.1217		20.2384	20.2646
HEHQUJ01	Dimer21_M2_M2		4.54892		-10.1901		0.004411	0.002985	-9.62451		-19.8072		51.408				-10.0889		-10.1901	-19.8072
HOVDEE	Dimer21_M1_M1		5.94973		-18.7344		0.000502	0.004312	-1.00616		-19.7357		94.88				-18.2925		-18.7344	-19.7357
HEHQUJ	Dimer3_M1_M1		3.24113		-17.9306		0.022927	0.022214	-1.84296		-19.7284		90.4731				-18.0371		-17.9306	-19.7284
MUVVEH	Dimer1_M1_M8		3.12488		19.9812		0.395379	0.079604	-1.3349		19.1213		91.6944				-20.048		19.9812	19.1213
MUVVEH01	Dimer8_M1_M1		5.70365		-19.1138		7e-06	0.000248	0.08566		-19.0279		99.5525				-18.9767		-19.1138	-19.0279
IVEQAE	Dimer11_M1_M1		3.50172		18.0175		-0.003485	-0.003409	1.01484		19.0254		94.6335				17.7831		18.0175	19.0254
FOSPOV	Dimer37_M1_M1		7.87955		18.1889		0	0	0.714667		18.9036		96.2194				18.0211		18.1889	18.9036
FOSPOV01	Dimer9_M1_M2		5.16564		18.6822		-0.001059	-0.002547	0.165477		18.8441		99.1031				18.515		18.6822	18.8441
JOGYUC	Dimer15_M1_M2		5.66754		-18.9638		0.000834	0.001734	0.149243		-18.812		99.2058				18.7579		-18.9638	-18.812
MUPMOC	Dimer10_M1_M3		3.22313		-18.5372		0.000629	0.000724	-0.273632		-18.8095		98.5383				18.4295		-18.5372	-18.8095
FOSPOV03	Dimer7_M1_M3		3.38046		-17.9002		0.024773	0.016685	-0.891595		-18.7504		95.0457				17.6176		-17.9002	-18.7504
HEHQUJ	Dimer21_M2_M2		4.55842		-10.2106		0.003775	0.002591	-8.43146		-18.6357		54.7531				-10.1349		-10.2106	-18.6357
JOGYUC	Dimer20_M1_M2		6.70847		-18.9422		0.000254	0.002326	0.322252		-18.6174		98.3141				18.5856		-18.9422	-18.6174
VABGIS	Dimer5_M3_M7		3.33485		-15.1787		0.022202	0.024129	-3.28517		-18.4175		82.0018				-15.1787		-15.1787	-18.4175
FOSPOV03	Dimer9_M1_M2		5.08132		-18.8294		0.001937	0.002655	0.460186		-18.3647		97.5911				18.6765		-18.8294	-18.3647
HEHQUJ01	Dimer13_M1_M1		3.75367		20.6515		-0.002125	-0.00381	-2.31588		18.3296		89.8934				20.392		20.6515	18.3296
HEHQUJ	Dimer13_M1_M1		3.75522		20.3614		-0.002794	-0.004128	-2.10824		18.2462		90.5895				20.1007		20.3614	18.2462
MUVVEH	Dimer29_M2_M8		6.338		-10.1902		1e-05	8.8e-05	-8.05427		-18.2444		55.8534				-10.0594		-10.1902	-18.2444
FOSPOV01	Dimer37_M1_M1		7.94161		17.9867		0	4e-06	0.229993		18.2167		98.7374				17.8125		17.9867	18.2167
OHEPID	Dimer73_M1_M7		7.14112		-6.56458		0	-2e-06	-11.4578		-18.0224		36.4245				-6.53947		-6.56458	-18.0224
FOSPOV	Dimer9_M1_M2		5.1458		17.8622		-0.001046	-0.0013	-0.162749		17.6971		99.0842				17.7014		17.8622	17.6971
MUPMOC	Dimer34_M1_M4		6.74825		-20.8996		0.000546	0.00179	3.24036		-17.6569		86.5684				20.5126		-20.8996	-17.6569
HEHQUJ01	Dimer15_M1_M2		3.76523		-12.381		0.000655	0.001089	-4.81705		-17.1963		71.9833				-12.2899		-12.381	-17.1963
VABGIS	Dimer69_M3_M5		6.54122		-15.4182		6e-06	1.8e-05	-1.46166		-16.8798		91.3406				-15.4182		-15.4182	-16.8798
VUBKAH02	Dimer19_M1_M2		5.68191		-16.5115		-2e-06	-0.000114	-0.161298		-16.673		99.0319				16.3164		-16.5115	-16.673
IVEQAE	Dimer35_M1_M1		7.71727		-16.2491		1e-06	9.2e-05	-0.329658		-16.5787		98.011				-16.0301		-16.2491	-16.5787
OHEPID	Dimer41_M1_M1		6.41385		3.79004		0	0	12.7483		16.5384		22.9166				3.73134		3.79004	16.5384
FOSPOV03	Dimer45_M1_M3		7.96649		14.3001		-4e-06	3.9e-05	1.87749		16.1776		88.3943				-14.0741		14.3001	16.1776
IVEQAE	Dimer31_M2_M2		7.65666		-16.0495		2e-06	-4.1e-05	-0.05519		-16.1047		99.657				-15.7686		-16.0495	-16.1047
VABGIS	Dimer21_M1_M1		3.54247		17.7469		-0.003706	-0.003696	-1.76831		15.9712		90.9043				17.7469		17.7469	15.9712
MUVVEH	Dimer65_M1_M3		7.15874		-16.0184		0	-1.2e-05	0.050916		-15.9675		99.6831				-15.9082		-16.0184	-15.9675
HEHQUJ	Dimer9_M2_M2		3.53664		17.8252		-0.002856	-0.003965	-2.07044		15.748		89.5628				17.5817		17.8252	15.748
HEHQUJ01	Dimer11_M2_M2		3.65338		12.5722		0.005711	0.006861	3.12277		15.7076		80.0393				12.5919		12.5722	15.7076
FOSPUB	Dimer13_M1_M1		7.11162		-15.2859		0.000122	0.000416	-0.019236		-15.3046		99.8708				-15.0326		-15.2859	-15.3046
KIZTAR01	Dimer9_M1_M2		3.45877		-7.25943		-0.000428	-0.000427	-7.92552		-15.1858		47.804				-7.14994		-7.25943	-15.1858
MUPMOC	Dimer38_M1_M2		6.78835		16.8596		-1e-06	-3.4e-05	-1.70108		15.1585		90.8349				-16.7365		16.8596	15.1585
HEHQUJ	Dimer15_M1_M2		3.76766		12.3392		-0.00134	-0.001602	2.57512		14.9114		82.7176				12.2496		12.3392	14.9114
KIZTAR01	Dimer1_M2_M2		2.97974		-17.2083		0.03907	0.028384	2.43368		-14.7072		87.31				-17.2261		-17.2083	-14.7072
MUPMOC	Dimer19_M2_M2		5.46498		-13.0978		1.6e-05	0.00014	-1.51079		-14.6084		89.6573				-13.0191		-13.0978	-14.6084
HOVDAA	Dimer25_M2_M3		7.31513		-13.1461		2e-06	-1.3e-05	-1.33332		-14.4794		90.7915				-12.9969		-13.1461	-14.4794
VUBJOU	Dimer35_M2_M2		6.68467		14.2972		-1.4e-05	-0.000138	0.072141		14.3692		99.4969				14.1262		14.2972	14.3692
KIZSUK	Dimer13_M1_M1		5.67558		-15.7674		0.000208	0.000927	1.5443		-14.222		91.0735				-15.6037		-15.7674	-14.222
FOSPOV03	Dimer37_M1_M1		7.82807		15.6475		1e-06	7e-06	-1.78842		13.8591		89.7429				15.4767		15.6475	13.8591
HEHQUJ	Dimer1_M1_M2		3.23972		14.069		0.008514	0.020632	-0.553586		13.5446		96.0228				13.8245		14.069	13.5446
KIZTAR01	Dimer23_M1_M2		7.10974		-16.7041		0	3.6e-05	3.23793		-13.4662		83.7631				-16.5773		-16.7041	-13.4662
KIZTAR01	Dimer19_M1_M2		6.29883		11.5617		-2.7e-05	-0.000142	1.53236		13.0939		88.2962				11.5007		11.5617	13.0939
HEHQUJ	Dimer33_M2_M2		7.58916		-10.3927		2.4e-05	0.000486	-2.64807		-13.0403		79.6909				-10.2138		-10.3927	-13.0403
VUBKAH01	Dimer1_M1_M1		3.2637		-12.5555		0.096544	0.049765	-0.622071		-13.0313		94.2331				-12.5364		-12.5555	-13.0313
KIZTAR	Dimer23_M1_M2		7.39114		-16.827		0	-9e-06	3.83967		-12.9874		81.4209				-16.7119		-16.827	-12.9874
HEHQUJ01	Dimer1_M1_M2		3.24232		-13.1256		-0.015309	-0.028955	0.375033		-12.7949		96.9044				-12.932		-13.1256	-12.7949
VUBKAH	Dimer13_M1_M1		6.80058		-13.1247		9e-06	0.000427	0.377936		-12.7463		97.1979				-12.8293		-13.1247	-12.7463
MUPMOC	Dimer26_M1_M1		6.41621		-15.4657		3e-06	9.5e-05	2.74363		-12.722		84.9324				-15.3485		-15.4657	-12.722
IVEQAE	Dimer25_M1_M1		6.29708		12.0175		0	-2e-06	0.633203		12.6507		94.9947				11.9379		12.0175	12.6507
HEHQUJ	Dimer11_M2_M2		3.66485		12.3694		0.006151	0.007467	0.228535		12.6115		98.0799				12.3984		12.3694	12.6115
FOSPOV	Dimer29_M1_M1		7.83918		-12.5737		0	-1.2e-05	0.074179		-12.4996		99.4134				-12.4627		-12.5737	-12.4996
HEHQUJ	Dimer27_M1_M1		6.62449		21.9018		2e-06	3.5e-05	-9.46353		12.4383		69.8279				21.6314		21.9018	12.4383
FOSPOV01	Dimer29_M1_M1		7.91264		-12.6119		0	-5e-06	0.299427		-12.3125		97.6809				-12.4975		-12.6119	-12.3125
VUBJOU	Dimer19_M1_M2		3.58303		-13.7694		-0.005961	-0.005673	1.56215		-12.2189		89.7428				13.7066		-13.7694	-12.2189
FOSPOV03	Dimer29_M1_M1		7.71461		-12.0892		1e-06	1.3e-05	-0.093529		-12.1828		99.2322				-11.9758		-12.0892	-12.1828
IVEQAE	Dimer27_M1_M2		7.35292		-16.0057		-1e-06	-2.4e-05	3.97702		-12.0287		80.0976				-15.8626		-16.0057	-12.0287
IVEQAE	Dimer33_M1_M2		7.68452		12.3627		-2e-06	5e-06	-0.351956		12.0107		97.2318				12.207		12.3627	12.0107
VUBKAH01	Dimer13_M1_M1		6.95769		-11.9349		2e-06	0.000145	0.004421		-11.9303		99.9617				-11.6683		-11.9349	-11.9303
JOGYUC	Dimer22_M1_M1		6.72608		-11.7728		0.000168	0.013465	-0.030674		-11.7898		99.6251				-11.5013		-11.7728	-11.7898
NULYEB	Dimer30_M3_M3		7.41732		12.9728		0	-1e-06	-1.2324		11.7404		91.3243				12.8461		12.9728	11.7404
HEHQUJ	Dimer35_M1_M1		7.65883		15.1897		0	0	-3.45826		11.7314		81.455				15.0087		15.1897	11.7314
IVEQAE	Dimer19_M2_M2		4.74547		12.8018		1.3e-05	1e-05	-1.22299		11.5788		91.2797				12.7011		12.8018	11.5788
FOSPUB	Dimer3_M1_M1		3.34102		11.5287		-0.004764	-0.008443	0.005912		11.5214		99.8344				11.3874		11.5287	11.5214
KIZTAR	Dimer5_M1_M2		3.28975		-13.339		0.003253	-0.009159	2.02626		-11.3186		86.7426				-13.1348		-13.339	-11.3186
VABGIS	Dimer77_M1_M7		6.65953		5.19572		-3e-06	-4.2e-05	6.08783		11.2835		46.0467				5.19572		5.19572	11.2835
HOVDAA	Dimer21_M1_M1		6.26433		-7.85711		5e-05	6.5e-05	-3.40512		-11.2621		69.7644				-7.75014		-7.85711	-11.2621
HOVDEE	Dimer19_M1_M1		5.38906		9.35186		-7.2e-05	-0.000185	1.81562		11.1672		83.74				9.26696		9.35186	11.1672
OHEPID	Dimer77_M1_M7		7.27021		7.36424		0	0	3.71853		11.0828		66.4476				7.30162		7.36424	11.0828
HEHQUJ01	Dimer25_M1_M2		6.20004		-8.97822		-3e-06	-4e-06	-2.05691		-11.0351		81.3603				-8.85472		-8.97822	-11.0351
KIZTAR01	Dimer7_M1_M2		3.36201		-13.3971		-0.016206	-0.018733	2.40887		-11.0232		84.5728				-13.3064		-13.3971	-11.0232
MUVVEH	Dimer57_M1_M8		6.80057		-7.52567		2e-06	3e-06	-3.49152		-11.0172		68.3084				-7.48404		-7.52567	-11.0172
MUPMOC	Dimer42_M1_M2		7.20051		12.1106		0	3e-06	-1.18477		10.9258		91.0888				-12.006		12.1106	10.9258
MUVVEH01	Dimer12_M1_M2		5.72287		-11.0354		-7.1e-05	-6.3e-05	0.258633		-10.7769		97.7088				-10.9845		-11.0354	-10.7769
HEHQUJ	Dimer25_M1_M2		6.18341		9.05719		1e-06	3e-06	1.62099		10.6782		84.8195				8.93823		9.05719	10.6782
HEHQUJ01	Dimer31_M1_M2		6.9806		-4.71544		1e-06	1.6e-05	14.9323		10.2169		23.9999				-4.65848		-4.71544	10.2169
HEHQUJ01	Dimer35_M1_M1		7.68993		15.3564		0	0	-5.14614		10.2102		74.8999				15.1745		15.3564	10.2102
IVEQAE	Dimer29_M2_M2		7.60422		11.6538		0	1e-06	-1.59623		10.0575		87.953				11.5313		11.6538	10.0575
PUGSIW	Dimer9_M1_M4		6.72531		-10.0098		8.9e-05	0.001302	-0.014085		-10.0225		99.8456				-9.94168		-10.0098	-10.0225
KIZTAR	Dimer19_M1_M2		6.32793		11.5763		-2.1e-05	-0.00022	-1.59036		9.98569		87.9197				11.5526		11.5763	9.98569
MUPMOC	Dimer16_M2_M4		3.35967		11.9843		-0.068284	0.023715	-1.99181		9.94797		85.1877				-11.5051		11.9843	9.94797
VUBJOU	Dimer43_M1_M1		7.35821		11.2518		0	1e-06	-1.3133		9.9385		89.548				11.132		11.2518	9.9385
MUVVEH	Dimer69_M1_M4		7.34973		12.979		0	1e-06	-3.54703		9.43194		78.5367				-12.9116		12.979	9.43194
VUBKAH	Dimer1_M1_M1		3.25987		-10.1147		0.064021	0.061259	0.594825		-9.39455		93.3538				-10.2693		-10.1147	-9.39455
FOSPOV03	Dimer1_M1_M4		3.24995		8.24586		0.087459	-0.005578	0.593524		8.92127		92.3138				8.04202		8.24586	8.92127
KIZTAR	Dimer13_M2_M2		3.93418		12.372		7e-06	-3.4e-05	-3.69925		8.67271		76.982				12.2889		12.372	8.67271
MUVVEH	Dimer61_M1_M4		7.09588		-12.6567		0	-4.1e-05	4.01961		-8.63712		75.8961				-12.5558		-12.6567	-8.63712
HOVDAA	Dimer29_M1_M1		7.85442		-4.82379		0	3e-06	-3.77945		-8.60324		56.0694				-4.76817		-4.82379	-8.60324
HEHQUJ	Dimer37_M1_M2		7.94439		6.70145		0	0	1.88434		8.58579		78.0528				6.61489		6.70145	8.58579
KIZTAR	Dimer21_M1_M2		6.9285		11.4198		-4e-06	-1.8e-05	-2.84049		8.57933		80.0811				11.2809		11.4198	8.57933
IVEQAE	Dimer5_M1_M2		3.35306		-9.27993		-0.035345	-0.020199	1.13559		-8.19989		88.6245				-9.27056		-9.27993	-8.19989
FOSPOV01	Dimer5_M1_M3		3.32262		9.02259		-0.32553	-0.098244	-0.477735		8.12109		90.916				-7.85736		9.02259	8.12109
HEHQUJ01	Dimer33_M2_M2		7.59867		-10.063		2.4e-05	0.000494	2.07844		-7.98405		82.8779				-9.88703		-10.063	-7.98405
KIZTAR01	Dimer21_M1_M2		6.82801		11.9555		-2e-06	-2.1e-05	-4.05318		7.90233		74.6813				11.8429		11.9555	7.90233
MUVVEH	Dimer17_M1_M7		5.5006		8.54857		-5e-05	-0.001014	-0.910261		7.63725		90.3664				8.43111		8.54857	7.63725
HOVDEE	Dimer15_M1_M2		3.84906		-14.6079		-0.002175	-0.002481	6.99008		-7.62249		67.6209				-14.4656		-14.6079	-7.62249
KIZTAR01	Dimer15_M1_M1		4.19322		11.2993		-2.5e-05	-3.3e-05	-3.72097		7.57831		75.2268				11.2		11.2993	7.57831
IVEQAE	Dimer13_M1_M2		3.8034		-3.82694		-0.000893	-0.000953	-3.7289		-7.55768		50.6364				-3.73074		-3.82694	-7.55768
PUGSIW	Dimer5_M1_M3		3.44628		-6.77553		-0.39769	-0.126835	0.117941		-7.18212		91.3391				-6.6337		-6.77553	-7.18212
MUPMOC	Dimer23_M1_M3		6.0946		7.21359		9.5e-05	0.000137	-0.033001		7.18082		99.5414				-7.19342		7.21359	7.18082
FOSPOV	Dimer1_M1_M4		3.2939		-7.43923		0.064079	0.004732	0.216931		-7.15349		96.3011				-7.38702		-7.43923	-7.15349
HEHQUJ	Dimer31_M1_M2		6.97213		4.7439		-1e-06	-1.9e-05	-11.5576		-6.81371		29.101				4.68985		4.7439	-6.81371
MUPMOC	Dimer36_M1_M4		6.75612		-4.57917		-7.7e-05	-0.000417	-2.21585		-6.79552		67.3852				4.54799		-4.57917	-6.79552
HEHQUJ	Dimer23_M1_M1		5.60098		9.01		7.2e-05	0.000111	-2.30226		6.70792		79.6468				8.92481		9.01	6.70792
HEHQUJ01	Dimer29_M1_M2		6.724		9.69382		-7.7e-05	-0.000478	-3.07473		6.61854		75.9162				9.683		9.69382	6.61854
OHEPID	Dimer25_M1_M3		6.16506		-13.6282		1e-06	-2e-05	7.03441		-6.59377		65.9557				-13.5272		-13.6282	-6.59377
HOVDAA	Dimer27_M2_M2		7.72594		-6.02715		0	5.7e-05	-0.366238		-6.39333		94.2708				-5.97239		-6.02715	-6.39333
OHEPID	Dimer65_M1_M4		6.83757		-13.3115		0	-1e-06	6.93397		-6.3775		65.7504				-13.2115		-13.3115	-6.3775
HEHQUJ01	Dimer23_M1_M1		5.59436		8.83989		8e-05	0.00012	-2.76174		6.07835		76.1939				8.7466		8.83989	6.07835
OHEPID	Dimer17_M1_M8		5.95823		8.41164		-3.3e-05	-0.000606	-2.35909		6.05191		78.0926				8.27699		8.41164	6.05191
HEHQUJ01	Dimer37_M1_M2		7.94875		-6.73286		0	0	1.14878		-5.58407		85.4246				-6.64265		-6.73286	-5.58407
FOSPOV03	Dimer21_M1_M4		7.30546		-4.89253		1e-06	4e-06	-0.563456		-5.45598		89.6726				4.8143		-4.89253	-5.45598
VUBJOU	Dimer25_M1_M2		4.52501		-5.6102		2.8e-05	4e-06	0.238016		-5.37215		95.9296				5.51722		-5.6102	-5.37215
MUPMOC	Dimer5_M2_M2		3.12846		8.19465		-0.000844	-0.000685	-2.91826		5.27486		73.7298				8.12014		8.19465	5.27486
FOSPOV01	Dimer1_M1_M4		3.30396		-5.82912		0.063771	-0.017925	0.55884		-5.22444		90.0994				-5.81329		-5.82912	-5.22444
VABGIS	Dimer1_M1_M3		3.31818		-6.52121		-0.071209	-0.084732	1.56558		-5.11157		79.1146				-6.52121		-6.52121	-5.11157
HEHQUJ	Dimer29_M1_M2		6.7125		-9.58582		7.7e-05	0.000505	4.77689		-4.80834		66.7383				-9.57864		-9.58582	-4.80834
JOGYUC	Dimer28_M1_M3		6.97299		5.32668		-4.4e-05	-0.000323	-0.535118		4.7912		90.8654				5.28886		5.32668	4.7912
KIZTAR	Dimer9_M1_M2		3.62972		-6.77092		-0.000342	-0.000376	2.07072		-4.70092		76.5737				-6.66967		-6.77092	-4.70092
KIZTAR01	Dimer17_M1_M2		5.47851		-7.7032		2e-06	1.1e-05	3.01721		-4.68598		71.8554				-7.64648		-7.7032	-4.68598
HOVDAA	Dimer1_M1_M2		3.21723		7.85852		0.772509	0.182845	-4.15085		4.66302		60.6146				-8.56439		7.85852	4.66302
FOSPOV01	Dimer25_M1_M4		7.84506		3.85933		0	6e-06	0.596215		4.45556		86.6185				3.78623		3.85933	4.45556
JOGYUC	Dimer19_M1_M3		6.49172		5.0008		-5e-05	-0.001435	-0.621099		4.37822		88.9287				4.85754		5.0008	4.37822
MUPMOC	Dimer40_M1_M4		6.882		-0.724594		-1e-05	-4.3e-05	-3.59695		-4.32159		16.7668				0.804446		-0.724594	-4.32159
FOSPOV	Dimer21_M1_M4		7.39236		4.22327		0	9e-06	-0.006544		4.21673		99.8451				4.15102		4.22327	4.21673
FOSPOV	Dimer25_M1_M4		7.80722		4.09621		0	6e-06	0.031002		4.12721		99.2487				4.02258		4.09621	4.12721
MUVVEH	Dimer33_M2_M2		6.46636		-0.747121		0	2e-06	4.72422		3.9771		13.6552				-0.773389		-0.747121	3.9771
IVEQAE	Dimer23_M2_M2		5.77735		-2.9472		2.9e-05	5.1e-05	-0.956907		-3.90403		75.4882				-2.93603		-2.9472	-3.90403
FOSPOV01	Dimer21_M1_M4		7.43811		-4.57681		0	-1e-06	0.94445		-3.63237		82.8943				4.50167		-4.57681	-3.63237
KIZTAR	Dimer17_M1_M2		5.34622		-8.05427		3e-06	1.7e-05	4.49946		-3.55479		64.1583				-7.98451		-8.05427	-3.55479
MUVVEH01	Dimer1_M1_M1		3.12199		4.1752		0.001471	0.001781	-0.727188		3.45126		85.1102				4.08482		4.1752	3.45126
VUBKAH	Dimer5_M1_M1		3.63908		2.74463		-0.026886	-0.027811	0.608841		3.29877		80.5309				2.65796		2.74463	3.29877
MUPMOC	Dimer30_M1_M4		6.5095		2.97332		-1.5e-05	9.9e-05	0.292642		3.26605		91.0365				-2.84683		2.97332	3.26605
IVEQAE	Dimer21_M1_M2		4.88089		-3.94562		-0.00042	-0.000453	0.941434		-3.00506		80.7218				-3.85613		-3.94562	-3.00506
MUPMOC	Dimer1_M1_M1		3.11606		0.874024		0.003231	0.003873	2.11173		2.99286		29.2037				0.767302		0.874024	2.99286
VUBKAH01	Dimer5_M1_M1		3.62509		3.60189		-0.025698	-0.02547	-0.567378		2.98335		85.344				3.51466		3.60189	2.98335
HOVDEE	Dimer23_M1_M2		6.19916		-7.50429		0	-1e-06	4.70039		-2.8039		61.487				-7.43657		-7.50429	-2.8039
HOVDAA	Dimer15_M1_M3		3.82206		3.0003		0.000449	0.000501	-0.342539		2.65871		89.7275				-3.01884		3.0003	2.65871
VUBKAH02	Dimer13_M1_M2		3.42006		-3.09816		-0.004545	-0.002167	0.480106		-2.62476		86.4206				2.93968		-3.09816	-2.62476
VUBKAH02	Dimer11_M2_M2		3.41219		2.60171		-0.045629	-0.041429	0.051253		2.5659		94.9522				2.51317		2.60171	2.5659
HEHQUJ01	Dimer19_M1_M2		4.26502		2.89104		-0.00017	-0.000251	-5.45411		-2.56349		34.6416				2.94313		2.89104	-2.56349
MUVVEH	Dimer21_M2_M8		6.12249		7.38683		5.5e-05	0.000816	-9.90359		-2.51589		42.72				7.31684		7.38683	-2.51589
VUBKAH02	Dimer15_M1_M1		3.69806		2.68492		-0.030193	-0.030718	-0.397832		2.22617		85.4074				2.54983		2.68492	2.22617
HEHQUJ	Dimer19_M1_M2		4.25589		-3.40322		0.000206	0.000185	1.25063		-2.15219		73.1208				-3.44746		-3.40322	-2.15219
OHEPID	Dimer33_M1_M8		6.26382		-1.21974		-1.3e-05	-9.2e-05	3.3717		2.15186		26.5649				-1.15588		-1.21974	2.15186
FOSPUB	Dimer11_M1_M1		6.89425		-1.92633		-2.8e-05	-0.000887	0.103758		-1.82349		94.8462				-1.96887		-1.92633	-1.82349
FOSPOV03	Dimer25_M1_M4		7.6682		-3.62864		0	-1e-05	2.01052		-1.61813		64.3471				3.55551		-3.62864	-1.61813
FOSPOV	Dimer5_M1_M3		3.32617		-1.93823		0.277018	0.112356	0.114352		-1.4345		79.372				-0.907398		-1.93823	-1.4345
HOVDEE	Dimer17_M1_M2		4.52195		-0.594488		-0.000145	-0.000284	-0.537521		-1.13244		52.4963				-0.602459		-0.594488	-1.13244
OHEPID	Dimer1_M1_M7		3.21726		1.9302		0.166224	-0.062628	-0.981571		1.05223		61.4592				1.77094		1.9302	1.05223
MUVVEH	Dimer25_M1_M7		6.29039		-0.96881		-5e-06	-0.000114	1.91457		0.945644		33.5984				-0.99639		-0.96881	0.945644
HOVDAA	Dimer19_M1_M2		4.9947		-4.83345		-3e-06	0	3.89461		-0.938836		55.3782				4.7687		-4.83345	-0.938836
MUVVEH	Dimer49_M1_M1		6.74388		5.36818		0	-1e-06	-4.61762		0.750562		53.7581				5.29465		5.36818	0.750562
MUPMOC	Dimer24_M1_M4		6.2397		-0.616986		-5e-06	0.000187	0.104948		-0.511856		85.4402				0.607228		-0.616986	-0.511856
VUBJOU	Dimer11_M2_M2		3.40483		0.205353		-0.013119	-0.017907	0.212837		0.387164		45.7136				-0.192391		0.205353	0.387164
IVEQAE	Dimer17_M1_M1		4.43024		13.5325		-8e-06	1.9e-05	-13.197		0.335567		50.6276				13.3925		13.5325	0.335567
HOVDEE	Dimer1_M1_M1		3.18477		-2.27176		0.002378	0.001533	2.22824		-0.039607		50.4397				-2.65639		-2.27176	-0.039607
