# Supplementary material for: Towards high-throughput exciton diffusion rate prediction in molecular organic semiconductors
Source: Royal Society of Chemistry journal article supplement (doi:10.1039/d4tc00737a), 2024-01-01
Supplement: d4tc00737a2.xlsx [file d4tc00737a2.xlsx]

## Sheet: EET_Data_F_wB97XD_B_6_31plusGd
	FOSPOV (with sidechains removed)													FOSPOV01 (with sidechains removed)													FOSPOV03 (with sidechains removed)													FOSPUB (with sidechains removed)
	delta-w (meV)	Coulomb (meV)	Exact-exchange (meV)	Exchange-correlation (meV)	w-avg*Overlap (meV)	w-avg (meV)	Overlap	Total coupling (meV)	% of Coupling that is Coulombic					delta-w (meV)	Coulomb (meV)	Exact-exchange (meV)	Exchange-correlation (meV)	w-avg*Overlap (meV)	w-avg (meV)	Overlap	Total coupling (meV)	% of Coupling that is Coulombic					delta-w (meV)	Coulomb (meV)	Exact-exchange (meV)	Exchange-correlation (meV)	w-avg*Overlap (meV)	w-avg (meV)	Overlap	Total coupling (meV)	% of Coupling that is Coulombic					delta-w (meV)	Coulomb (meV)	Exact-exchange (meV)	Exchange-correlation (meV)	w-avg*Overlap (meV)	w-avg (meV)	Overlap	Total coupling (meV)	% of Coupling that is Coulombic
Dimer1_M1_M4	-0.01352	-7.43923	0.064079	0.004732	0.216931	2450.9	8.85101e-05	-7.15348	0.963011				Dimer1_M1_M4	-0.004095	-5.82912	0.063771	-0.017925	0.55884	2466.9	0.000226536	-5.22444	0.900994				Dimer1_M1_M4	-0.012988	8.24586	0.087459	-0.005578	0.593524	2611.4	0.00022728	8.92127	0.923138				Dimer1_M1_M1	0	-27.7743	0.193397	0.117361	0.036347	2508.2	1.44914e-05	-27.4272	0.987657
Dimer5_M1_M3	0	-1.93823	0.277018	0.112356	0.114352	2450.9	4.66564e-05	-1.4345	0.79372				Dimer5_M1_M3	0	9.02259	-0.32553	-0.098244	-0.477735	2466.9	-0.000193658	8.12109	0.90916				Dimer5_M1_M3	0	27.2538	-0.481111	-0.193154	1.36377	2611.5	0.000522225	27.9433	0.930423				Dimer3_M1_M1	-1e-06	11.5287	-0.004764	-0.008443	0.005912	2508.2	2.3569e-06	11.5214	0.998344
Dimer7_M1_M3	0	39.2454	-0.119125	-0.065642	-0.194071	2450.9	-7.91824e-05	38.8666	0.990439				Dimer7_M1_M3	0	-37.9808	0.105653	0.040452	-0.593983	2466.9	-0.000240781	-38.4287	0.980887				Dimer7_M1_M3	0	-17.9002	0.024773	0.016685	-0.891595	2611.5	-0.000341417	-18.7504	0.950457				Dimer5_M1_M1	-1e-06	-24.4361	0.002813	0.002906	0.344989	2508.2	0.000137547	-24.0854	0.985851
Dimer9_M1_M2	0.035368	17.8622	-0.001046	-0.0013	-0.162749	2450.9	-6.64036e-05	17.6971	0.990842				Dimer9_M1_M2	0.029606	18.6822	-0.001059	-0.002547	0.165477	2466.9	6.70796e-05	18.8441	0.991031				Dimer9_M1_M2	0.027019	-18.8294	0.001937	0.002655	0.460186	2611.4	0.000176219	-18.3647	0.975911				Dimer7_M1_M1	0.000218	22.7081	-0.000255	-7.1e-05	0.025169	2508.2	1.0035e-05	22.7329	0.998879
Dimer13_M1_M2	0.021759	-36.7613	0.001533	0.001667	0.139997	2450.9	5.71206e-05	-36.6181	0.99612				Dimer13_M1_M2	0.018905	-36.4427	0.001725	0.002425	0.010665	2466.9	4.32324e-06	-36.4278	0.999594				Dimer13_M1_M2	0.006792	-32.6682	0.002114	0.002802	0.722444	2611.4	0.000276646	-31.9408	0.97822				Dimer9_M1_M1	-1e-06	32.6319	2e-05	0.000518	-0.004346	2508.2	-1.73291e-06	32.6281	0.99985
Dimer17_M1_M2	-0.032411	-28.8512	-7e-06	0.001563	-0.127492	2450.9	-5.20182e-05	-28.9771	0.995547				Dimer17_M1_M2	0.016295	-27.2344	-5.5e-05	0.00154	-0.03572	2466.9	-1.448e-05	-27.2686	0.998632				Dimer17_M1_M2	-0.020494	-22.9037	-0.00013	0.001061	1.57607	2611.4	0.000603528	-21.3266	0.935572				Dimer11_M1_M1	-1e-06	-1.92633	-2.8e-05	-0.000887	0.103758	2508.2	4.13681e-05	-1.82349	0.948462
Dimer21_M1_M4	0.015147	4.22327	0	9e-06	-0.006544	2450.9	-2.67006e-06	4.21673	0.998451				Dimer21_M1_M4	0.004632	-4.57681	0	-1e-06	0.94445	2466.9	0.000382853	-3.63237	0.828943				Dimer21_M1_M4	-0.002607	-4.89253	1e-06	4e-06	-0.563456	2611.4	-0.000215764	-5.45598	0.896726				Dimer13_M1_M1	0	-15.2859	0.000122	0.000416	-0.019236	2508.2	-7.66945e-06	-15.3046	0.998708
Dimer25_M1_M4	-0.019938	4.09621	0	6e-06	0.031002	2450.9	1.2649e-05	4.12721	0.992487				Dimer25_M1_M4	-0.019556	3.85933	0	6e-06	0.596215	2466.9	0.000241687	4.45556	0.866185				Dimer25_M1_M4	0.013407	-3.62864	0	-1e-05	2.01052	2611.4	0.000769885	-1.61813	0.643471
Dimer29_M1_M1	0	-12.5737	0	-1.2e-05	0.074179	2450.9	3.02661e-05	-12.4996	0.994134				Dimer29_M1_M1	0	-12.6119	0	-5e-06	0.299427	2466.9	0.000121379	-12.3125	0.976809				Dimer29_M1_M1	0	-12.0892	1e-06	1.3e-05	-0.093529	2611.4	-3.5815e-05	-12.1828	0.992322
Dimer37_M1_M1	0.000341	18.1889	0	0	0.714667	2450.9	0.000291595	18.9036	0.962194				Dimer37_M1_M1	0	17.9867	0	4e-06	0.229993	2466.9	9.32332e-05	18.2167	0.987374				Dimer37_M1_M1	-1e-06	15.6475	1e-06	7e-06	-1.78842	2611.4	-0.000684842	13.8591	0.897429
																										Dimer45_M1_M3	0.000413	14.3001	-4e-06	3.9e-05	1.87749	2611.5	0.000718941	16.1776	0.883943
